# Supplementary material
Source: PubMed Central journal article supplement (PMC4026328)
Supplement: NIHMS569313-supplement-Supplemental_data.pdf [file NIHMS569313-supplement-Supplemental_data.pdf]

| N           | P | SNR = 1 |                |                |                |                |                |                |                |                |                |                |                |                |                |                | SNR = 5        |                |                |                |                |                |                |                |                |                |                |                |                |                |                | SNR = 25       |                |                |                |                |                |                |                |                |                |                |                |                |                |                |                |                |                |                |                |                |                |                |                |                |                |                |                |                |                |                |                |                |                |                |                |                |                |                |                |                |                |                |                |                |                |                |                |                |                |                |                |                |                |                |                |                |                |                |                |                |                |                |                |                |                |                |                |                |                |                |                |                |                |                |                |                |                |                |                |                |                |                |                |                |                |                |                |                |                |                |                |                |                |                |                |                |                |                |                |                |                |                |                |                |                |                |                |                |                |                |                |                |                |                |                |                |                |                |                |                |                |                |                |                |                |                |                |                |                |                |                |                |                |                |                |                |                |                |                |                |                |                |                |                |                |                |                |                |                |                |                |                |                |                |                |                |                |                |                |                |                |                |                |                |                |                |                |                |                |                |                |                |                |                |                |                |                |                |                |                |                |                |                |                |                |                |                |   |                |                |                |                |                |                |                |                |                |                |                |                |                |                |                |                |                |                |                |                |                |                |                |                |                |                |                |                |                |                |                |                |                |                |                |                |                |                |                |                |                |                |                |                |                |                |                |                |                |                |                |                |                |                |   |                |                |                |                |                |                |                |                |                |                |                |                |                |                |                |                |                |                |                |                |                |                |                |                |                |                |                |                |                |                |                |                |                |                |                |                |                |                |                |                |                |                |                |                |                |                |                |                |                |                |                |                |                |                |                |                |                |                |                |                |                |                |                |                |                |                |                |                |                |                |                |                |                |                |                |                |                |                |                |                |                |   |                |                |                |                |                |                |                |                |                |                |                |                |                |                |                |                |                |                |                |                |                |                |                |                |                |                |                |             |    |                |                |                |                |                |                |                |                |                |                |                |                |                |                |                |                |                |                |                |                |                |                |                |                |                |                |                |
|-------------|---|---------|----------------|----------------|----------------|----------------|----------------|----------------|----------------|----------------|----------------|----------------|----------------|----------------|----------------|----------------|----------------|----------------|----------------|----------------|----------------|----------------|----------------|----------------|----------------|----------------|----------------|----------------|----------------|----------------|----------------|----------------|----------------|----------------|----------------|----------------|----------------|----------------|----------------|----------------|----------------|----------------|----------------|----------------|----------------|----------------|----------------|----------------|----------------|----------------|----------------|----------------|----------------|----------------|----------------|----------------|----------------|----------------|----------------|----------------|----------------|----------------|----------------|----------------|----------------|----------------|----------------|----------------|----------------|----------------|----------------|----------------|----------------|----------------|----------------|----------------|----------------|----------------|----------------|----------------|----------------|----------------|----------------|----------------|----------------|----------------|----------------|----------------|----------------|----------------|----------------|----------------|----------------|----------------|----------------|----------------|----------------|----------------|----------------|----------------|----------------|----------------|----------------|----------------|----------------|----------------|----------------|----------------|----------------|----------------|----------------|----------------|----------------|----------------|----------------|----------------|----------------|----------------|----------------|----------------|----------------|----------------|----------------|----------------|----------------|----------------|----------------|----------------|----------------|----------------|----------------|----------------|----------------|----------------|----------------|----------------|----------------|----------------|----------------|----------------|----------------|----------------|----------------|----------------|----------------|----------------|----------------|----------------|----------------|----------------|----------------|----------------|----------------|----------------|----------------|----------------|----------------|----------------|----------------|----------------|----------------|----------------|----------------|----------------|----------------|----------------|----------------|----------------|----------------|----------------|----------------|----------------|----------------|----------------|----------------|----------------|----------------|----------------|----------------|----------------|----------------|----------------|----------------|----------------|----------------|----------------|----------------|----------------|----------------|----------------|----------------|----------------|----------------|----------------|----------------|----------------|----------------|----------------|----------------|----------------|----------------|----------------|----------------|----------------|----------------|----------------|----------------|----------------|----------------|----------------|----------------|----------------|----------------|----------------|----------------|----------------|----------------|----------------|----------------|---|----------------|----------------|----------------|----------------|----------------|----------------|----------------|----------------|----------------|----------------|----------------|----------------|----------------|----------------|----------------|----------------|----------------|----------------|----------------|----------------|----------------|----------------|----------------|----------------|----------------|----------------|----------------|----------------|----------------|----------------|----------------|----------------|----------------|----------------|----------------|----------------|----------------|----------------|----------------|----------------|----------------|----------------|----------------|----------------|----------------|----------------|----------------|----------------|----------------|----------------|----------------|----------------|----------------|----------------|---|----------------|----------------|----------------|----------------|----------------|----------------|----------------|----------------|----------------|----------------|----------------|----------------|----------------|----------------|----------------|----------------|----------------|----------------|----------------|----------------|----------------|----------------|----------------|----------------|----------------|----------------|----------------|----------------|----------------|----------------|----------------|----------------|----------------|----------------|----------------|----------------|----------------|----------------|----------------|----------------|----------------|----------------|----------------|----------------|----------------|----------------|----------------|----------------|----------------|----------------|----------------|----------------|----------------|----------------|----------------|----------------|----------------|----------------|----------------|----------------|----------------|----------------|----------------|----------------|----------------|----------------|----------------|----------------|----------------|----------------|----------------|----------------|----------------|----------------|----------------|----------------|----------------|----------------|----------------|----------------|----------------|---|----------------|----------------|----------------|----------------|----------------|----------------|----------------|----------------|----------------|----------------|----------------|----------------|----------------|----------------|----------------|----------------|----------------|----------------|----------------|----------------|----------------|----------------|----------------|----------------|----------------|----------------|----------------|-------------|----|----------------|----------------|----------------|----------------|----------------|----------------|----------------|----------------|----------------|----------------|----------------|----------------|----------------|----------------|----------------|----------------|----------------|----------------|----------------|----------------|----------------|----------------|----------------|----------------|----------------|----------------|----------------|
|             |   | SIR = 1 |                |                |                |                | SIR = 5        |                |                |                |                | SIR = 25       |                |                |                |                | SIR = 1        |                |                |                |                | SIR = 5        |                |                |                |                | SIR = 25       |                |                |                |                |                |                |                |                |                |                |                |                |                |                |                |                |                |                |                |                |                |                |                |                |                |                |                |                |                |                |                |                |                |                |                |                |                |                |                |                |                |                |                |                |                |                |                |                |                |                |                |                |                |                |                |                |                |                |                |                |                |                |                |                |                |                |                |                |                |                |                |                |                |                |                |                |                |                |                |                |                |                |                |                |                |                |                |                |                |                |                |                |                |                |                |                |                |                |                |                |                |                |                |                |                |                |                |                |                |                |                |                |                |                |                |                |                |                |                |                |                |                |                |                |                |                |                |                |                |                |                |                |                |                |                |                |                |                |                |                |                |                |                |                |                |                |                |                |                |                |                |                |                |                |                |                |                |                |                |                |                |                |                |                |                |                |                |                |                |                |                |                |                |                |                |                |                |                |                |                |                |                |                |                |                |                |                |                |                |                |                |                |   |                |                |                |                |                |                |                |                |                |                |                |                |                |                |                |                |                |                |                |                |                |                |                |                |                |                |                |                |                |                |                |                |                |                |                |                |                |                |                |                |                |                |                |                |                |                |                |                |                |                |                |                |                |                |   |                |                |                |                |                |                |                |                |                |                |                |                |                |                |                |                |                |                |                |                |                |                |                |                |                |                |                |                |                |                |                |                |                |                |                |                |                |                |                |                |                |                |                |                |                |                |                |                |                |                |                |                |                |                |                |                |                |                |                |                |                |                |                |                |                |                |                |                |                |                |                |                |                |                |                |                |                |                |                |                |                |   |                |                |                |                |                |                |                |                |                |                |                |                |                |                |                |                |                |                |                |                |                |                |                |                |                |                |                |             |    |                |                |                |                |                |                |                |                |                |                |                |                |                |                |                |                |                |                |                |                |                |                |                |                |                |                |                |
| 100 samples |   | 10      | [0.810, 0.842] | [0.819, 0.848] | [0.839, 0.872] | [0.849, 0.876] | [0.879, 0.903] | [0.889, 0.915] | [0.864, 0.893] | [0.889, 0.915] | [0.910, 0.932] | [0.616, 0.657] | [0.619, 0.657] | [0.645, 0.691] | [0.696, 0.732] | [0.681, 0.717] | [0.704, 0.745] | [0.715, 0.755] | [0.706, 0.750] | [0.735, 0.775] | [0.609, 0.648] | [0.614, 0.655] | [0.622, 0.668] | [0.678, 0.714] | [0.654, 0.689] | [0.678, 0.723] | [0.690, 0.734] | [0.668, 0.712] | [0.686, 0.730] | [0.813, 0.841] | [0.850, 0.876] | [0.843, 0.874] | [0.856, 0.883] | [0.897, 0.919] | [0.901, 0.925] | [0.857, 0.889] | [0.895, 0.920] | [0.909, 0.932] | [0.636, 0.673] | [0.631, 0.670] | [0.671, 0.715] | [0.696, 0.733] | [0.690, 0.728] | [0.723, 0.762] | [0.709, 0.751] | [0.717, 0.758] | [0.753, 0.793] | [0.602, 0.642] | [0.587, 0.628] | [0.615, 0.664] | [0.624, 0.663] | [0.622, 0.661] | [0.651, 0.695] | [0.658, 0.705] | [0.661, 0.707] | [0.633, 0.676] | [0.774, 0.806] | [0.805, 0.836] | [0.820, 0.854] | [0.829, 0.857] | [0.871, 0.895] | [0.886, 0.913] | [0.844, 0.875] | [0.884, 0.910] | [0.888, 0.913] | [0.590, 0.628] | [0.616, 0.657] | [0.610, 0.656] | [0.671, 0.710] | [0.671, 0.709] | [0.696, 0.740] | [0.673, 0.716] | [0.700, 0.742] | [0.723, 0.763] | [0.528, 0.568] | [0.568, 0.607] | [0.555, 0.604] | [0.596, 0.635] | [0.602, 0.643] | [0.599, 0.644] | [0.587, 0.635] | [0.586, 0.634] | [0.591, 0.641] | [0.716, 0.751] | [0.752, 0.786] | [0.758, 0.795] | [0.778, 0.808] | [0.840, 0.867] | [0.842, 0.875] | [0.792, 0.828] | [0.864, 0.892] | [0.863, 0.893] | [0.553, 0.597] | [0.565, 0.604] | [0.550, 0.598] | [0.616, 0.655] | [0.653, 0.692] | [0.631, 0.678] | [0.649, 0.697] | [0.681, 0.724] | [0.688, 0.732] | [0.514, 0.554] | [0.514, 0.553] | [0.501, 0.551] | [0.531, 0.573] | [0.558, 0.598] | [0.522, 0.571] | [0.543, 0.589] | [0.570, 0.615] | [0.534, 0.588] | [0.624, 0.662] | [0.651, 0.688] | [0.672, 0.717] | [0.695, 0.734] | [0.770, 0.801] | [0.788, 0.824] | [0.725, 0.768] | [0.801, 0.838] | [0.848, 0.879] | [0.522, 0.561] | [0.526, 0.566] | [0.536, 0.585] | [0.560, 0.600] | [0.587, 0.626] | [0.583, 0.632] | [0.601, 0.647] | [0.622, 0.666] | [0.668, 0.712] | [0.485, 0.527] | [0.486, 0.527] | [0.491, 0.540] | [0.501, 0.542] | [0.492, 0.535] | [0.526, 0.575] | [0.510, 0.561] | [0.480, 0.526] | [0.494, 0.545] | 2              | [0.924, 0.942] | [0.935, 0.950] | [0.931, 0.949] | [0.948, 0.962] | [0.970, 0.979] | [0.973, 0.984] | [0.956, 0.971] | [0.969, 0.979] | [0.976, 0.986] | [0.758, 0.790] | [0.775, 0.806] | [0.762, 0.801] | [0.846, 0.873] | [0.852, 0.878] | [0.861, 0.889] | [0.873, 0.900] | [0.858, 0.887] | [0.888, 0.915] | [0.735, 0.769] | [0.748, 0.784] | [0.738, 0.779] | [0.812, 0.842] | [0.815, 0.842] | [0.833, 0.864] | [0.835, 0.866] | [0.823, 0.856] | [0.839, 0.870] | [0.928, 0.945] | [0.959, 0.970] | [0.957, 0.972] | [0.966, 0.976] | [0.977, 0.985] | [0.979, 0.988] | [0.965, 0.977] | [0.978, 0.987] | [0.983, 0.991] | [0.789, 0.819] | [0.807, 0.836] | [0.822, 0.855] | [0.869, 0.893] | [0.869, 0.894] | [0.882, 0.911] | [0.883, 0.909] | [0.899, 0.922] | [0.909, 0.931] | [0.729, 0.764] | [0.732, 0.767] | [0.749, 0.787] | [0.789, 0.820] | [0.800, 0.830] | [0.806, 0.842] | [0.821, 0.855] | [0.826, 0.859] | [0.822, 0.856] | [0.921, 0.938] | [0.942, 0.956] | [0.955, 0.970] | [0.948, 0.962] | [0.975, 0.984] | [0.977, 0.986] | [0.957, 0.973] | [0.979, 0.987] | [0.982, 0.990] | [0.755, 0.786] | [0.776, 0.808] | [0.788, 0.824] | [0.843, 0.869] | [0.879, 0.901] | [0.886, 0.911] | [0.876, 0.906] | [0.896, 0.922] | [0.903, 0.926] | [0.665, 0.698] | [0.686, 0.725] | [0.680, 0.723] | [0.759, 0.795] | [0.763, 0.795] | [0.771, 0.808] | [0.782, 0.820] | [0.796, 0.834] | [0.778, 0.817] | 6 | [0.882, 0.904] | [0.925, 0.943] | [0.910, 0.932] | [0.928, 0.945] | [0.967, 0.977] | [0.968, 0.979] | [0.942, 0.960] | [0.973, 0.983] | [0.977, 0.986] | [0.674, 0.714] | [0.714, 0.747] | [0.731, 0.773] | [0.808, 0.838] | [0.839, 0.866] | [0.836, 0.867] | [0.854, 0.883] | [0.870, 0.897] | [0.882, 0.908] | [0.604, 0.644] | [0.615, 0.652] | [0.653, 0.697] | [0.704, 0.742] | [0.711, 0.745] | [0.693, 0.736] | [0.744, 0.783] | [0.736, 0.774] | [0.740, 0.778] | [0.790, 0.821] | [0.846, 0.872] | [0.854, 0.883] | [0.872, 0.896] | [0.944, 0.958] | [0.952, 0.967] | [0.904, 0.927] | [0.954, 0.969] | [0.972, 0.983] | [0.604, 0.642] | [0.628, 0.668] | [0.673, 0.719] | [0.731, 0.766] | [0.776, 0.808] | [0.784, 0.821] | [0.831, 0.862] | [0.851, 0.880] | [0.876, 0.903] | [0.569, 0.608] | [0.559, 0.601] | [0.588, 0.637] | [0.620, 0.660] | [0.641, 0.679] | [0.634, 0.678] | [0.684, 0.729] | [0.695, 0.739] | [0.697, 0.741] | 4 | [0.981, 0.988] | [0.987, 0.993] | [0.987, 0.993] | [0.991, 0.996] | [0.996, 0.999] | [0.995, 0.998] | [0.993, 0.996] | [0.998, 0.999] | [0.997, 0.999] | [0.913, 0.932] | [0.920, 0.939] | [0.916, 0.939] | [0.957, 0.969] | [0.966, 0.976] | [0.964, 0.977] | [0.968, 0.980] | [0.970, 0.981] | [0.977, 0.986] | [0.886, 0.909] | [0.894, 0.916] | [0.884, 0.911] | [0.934, 0.950] | [0.946, 0.960] | [0.944, 0.962] | [0.950, 0.965] | [0.947, 0.963] | [0.954, 0.968] | [0.990, 0.995] | [0.995, 0.998] | [0.995, 0.998] | [0.996, 0.998] | [0.999, 0.999] | [0.999, 1.000] | [0.995, 0.998] | [0.999, 1.000] | [0.999, 1.000] | [0.940, 0.955] | [0.954, 0.966] | [0.949, 0.965] | [0.972, 0.982] | [0.980, 0.987] | [0.983, 0.990] | [0.984, 0.991] | [0.984, 0.991] | [0.988, 0.994] | [0.889, 0.911] | [0.899, 0.920] | [0.898, 0.922] | [0.934, 0.950] | [0.948, 0.962] | [0.948, 0.964] | [0.948, 0.963] | [0.957, 0.970] | [0.952, 0.967] | [0.988, 0.993] | [0.994, 0.997] | [0.995, 0.998] | [0.995, 0.998] | [0.998, 0.999] | [0.999, 1.000] | [0.995, 0.998] | [0.999, 1.000] | [0.999, 1.000] | [0.935, 0.950] | [0.949, 0.962] | [0.945, 0.963] | [0.977, 0.985] | [0.979, 0.987] | [0.981, 0.989] | [0.980, 0.989] | [0.991, 0.995] | [0.989, 0.994] | [0.855, 0.880] | [0.872, 0.896] | [0.879, 0.906] | [0.928, 0.945] | [0.924, 0.940] | [0.935, 0.954] | [0.940, 0.957] | [0.948, 0.963] | [0.942, 0.959] | 2 | [0.982, 0.988] | [0.993, 0.996] | [0.990, 0.996] | [0.993, 0.996] | [0.998, 0.999] | [0.998, 0.999] | [0.993, 0.997] | [0.997, 1.000] | [0.999, 1.000] | [0.901, 0.921] | [0.921, 0.939] | [0.931, 0.949] | [0.965, 0.977] | [0.976, 0.984] | [0.978, 0.987] | [0.978, 0.988] | [0.985, 0.992] | [0.987, 0.993] | [0.787, 0.818] | [0.809, 0.836] | [0.826, 0.859] | [0.890, 0.911] | [0.904, 0.922] | [0.898, 0.922] | [0.922, 0.942] | [0.924, 0.944] | [0.937, 0.956] | 400 samples | 10 | [0.937, 0.952] | [0.964, 0.976] | [0.969, 0.981] | [0.974, 0.982] | [0.996, 0.998] | [0.995, 0.998] | [0.995, 0.998] | [0.981, 0.990] | [0.997, 1.000] | [0.789, 0.819] | [0.822, 0.849] | [0.842, 0.873] | [0.942, 0.956] | [0.950, 0.963] | [0.962, 0.975] | [0.970, 0.982] | [0.979, 0.988] | [0.985, 0.992] | [0.707, 0.742] | [0.701, 0.737] | [0.720, 0.763] | [0.843, 0.871] | [0.841, 0.866] | [0.851, 0.881] | [0.903, 0.927] | [0.902, 0.925] | [0.902, 0.925] |
| 200 samples |   | 10      | [0.981, 0.988] | [0.987, 0.993] | [0.987, 0.993] | [0.991, 0.996] | [0.996, 0.999] | [0.995, 0.998] | [0.993, 0.996] | [0.998, 0.999] | [0.997, 0.999] | [0.913, 0.932] | [0.920, 0.939] | [0.916, 0.939] | [0.957, 0.969] | [0.966, 0.976] | [0.964, 0.977] | [0.968, 0.980] | [0.970, 0.981] | [0.977, 0.986] | [0.886, 0.909] | [0.894, 0.916] | [0.884, 0.911] | [0.934, 0.950] | [0.946, 0.960] | [0.944, 0.962] | [0.950, 0.965] | [0.947, 0.963] | [0.954, 0.968] | [0.990, 0.995] | [0.995, 0.998] | [0.995, 0.998] | [0.996, 0.998] | [0.999, 0.999] | [0.999, 1.000] | [0.995, 0.998] | [0.999, 1.000] | [0.999, 1.000] | [0.940, 0.955] | [0.954, 0.966] | [0.949, 0.965] | [0.972, 0.982] | [0.980, 0.987] | [0.983, 0.990] | [0.984, 0.991] | [0.984, 0.991] | [0.988, 0.994] | [0.889, 0.911] | [0.899, 0.920] | [0.898, 0.922] | [0.934, 0.950] | [0.948, 0.962] | [0.948, 0.964] | [0.948, 0.963] | [0.957, 0.970] | [0.952, 0.967] | [0.988, 0.993] | [0.994, 0.997] | [0.995, 0.998] | [0.995, 0.998] | [0.998, 0.999] | [0.999, 1.000] | [0.995, 0.998] | [0.999, 1.000] | [0.999, 1.000] | [0.935, 0.950] | [0.949, 0.962] | [0.945, 0.963] | [0.977, 0.985] | [0.979, 0.987] | [0.981, 0.989] | [0.980, 0.989] | [0.991, 0.995] | [0.989, 0.994] | [0.855, 0.880] | [0.872, 0.896] | [0.879, 0.906] | [0.928, 0.945] | [0.924, 0.940] | [0.935, 0.954] | [0.940, 0.957] | [0.948, 0.963] | [0.942, 0.959] | 6              | [0.921, 0.938] | [0.942, 0.956] | [0.955, 0.970] | [0.948, 0.962] | [0.975, 0.984] | [0.977, 0.986] | [0.957, 0.973] | [0.979, 0.987] | [0.982, 0.990] | [0.755, 0.786] | [0.776, 0.808] | [0.788, 0.824] | [0.843, 0.869] | [0.879, 0.901] | [0.886, 0.911] | [0.876, 0.906] | [0.896, 0.922] | [0.903, 0.926] | [0.665, 0.698] | [0.686, 0.725] | [0.680, 0.723] | [0.759, 0.795] | [0.763, 0.795] | [0.771, 0.808] | [0.782, 0.820] | [0.796, 0.834] | [0.778, 0.817] | 4              | [0.921, 0.938] | [0.942, 0.956] | [0.955, 0.970] | [0.948, 0.962] | [0.975, 0.984] | [0.977, 0.986] | [0.957, 0.973] | [0.979, 0.987] | [0.982, 0.990] | [0.789, 0.819] | [0.807, 0.836] | [0.822, 0.855] | [0.869, 0.893] | [0.869, 0.894] | [0.882, 0.911] | [0.883, 0.909] | [0.899, 0.922] | [0.909, 0.931] | [0.729, 0.764] | [0.732, 0.767] | [0.749, 0.787] | [0.789, 0.820] | [0.800, 0.830] | [0.806, 0.842] | [0.821, 0.855] | [0.826, 0.859] | [0.822, 0.856] | 2              | [0.924, 0.942] | [0.935, 0.950] | [0.931, 0.949] | [0.948, 0.962] | [0.970, 0.979] | [0.973, 0.984] | [0.956, 0.971] | [0.969, 0.979] | [0.976, 0.986] | [0.758, 0.790] | [0.775, 0.806] | [0.762, 0.801] | [0.846, 0.873] | [0.852, 0.878] | [0.861, 0.889] | [0.873, 0.900] | [0.858, 0.887] | [0.888, 0.915] | [0.735, 0.769] | [0.748, 0.784] | [0.738, 0.779] | [0.812, 0.842] | [0.815, 0.842] | [0.833, 0.864] | [0.835, 0.866] | [0.823, 0.856] | [0.839, 0.870] | 10             | [0.924, 0.942] | [0.935, 0.950] | [0.931, 0.949] | [0.948, 0.962] | [0.970, 0.979] | [0.973, 0.984] | [0.956, 0.971] | [0.969, 0.979] | [0.976, 0.986] | [0.485, 0.527] | [0.486, 0.527] | [0.491, 0.540] | [0.501, 0.542] | [0.492, 0.535] | [0.526, 0.575] | [0.510, 0.561] | [0.480, 0.526] | [0.494, 0.545] |                |                |                |                |                |                |                |                |                |                |                |                |                |                |                |                |                |                |                |                |                |                |                |                |                |                |                |                |                |                |                |                |                |   |                |                |                |                |                |                |                |                |                |                |                |                |                |                |                |                |                |                |                |                |                |                |                |                |                |                |                |                |                |                |                |                |                |                |                |                |                |                |                |                |                |                |                |                |                |                |                |                |                |                |                |                |                |                |   |                |                |                |                |                |                |                |                |                |                |                |                |                |                |                |                |                |                |                |                |                |                |                |                |                |                |                |                |                |                |                |                |                |                |                |                |                |                |                |                |                |                |                |                |                |                |                |                |                |                |                |                |                |                |                |                |                |                |                |                |                |                |                |                |                |                |                |                |                |                |                |                |                |                |                |                |                |                |                |                |                |   |                |                |                |                |                |                |                |                |                |                |                |                |                |                |                |                |                |                |                |                |                |                |                |                |                |                |                |             |    |                |                |                |                |                |                |                |                |                |                |                |                |                |                |                |                |                |                |                |                |                |                |                |                |                |                |                |

Table 1: 95% confidence interval of the area under the ROC curve for differing sample sizes  $N$ , AR model order  $P$ , SIR and SNR. The standard text is for GC with known weights; the **bold** is for CGC and the *italics* is for MGC. In each case, CGC's interval is consistently higher than MGC's. As SNR increases,  $N$  decreases or  $P$  increases, this difference in performance increases.

| N           | P  | SNR = 1        |                |                |                |                |                |                |                |                |                | SNR = 5        |                |                |                |                |                |                |                |         |  | SNR = 25 |         |  |  |          |  |  |  |  |  |
|-------------|----|----------------|----------------|----------------|----------------|----------------|----------------|----------------|----------------|----------------|----------------|----------------|----------------|----------------|----------------|----------------|----------------|----------------|----------------|---------|--|----------|---------|--|--|----------|--|--|--|--|--|
|             |    | SIR = 1        |                |                | SIR = 5        |                |                | SIR = 25       |                |                | SIR = 1        |                |                | SIR = 5        |                |                | SIR = 25       |                |                | SIR = 1 |  |          | SIR = 5 |  |  | SIR = 25 |  |  |  |  |  |
| 100 samples | 2  | [0.005, 0.203] | [0.005, 0.210] | [0.005, 0.217] | [0.008, 0.219] | [0.007, 0.212] | [0.007, 0.209] | [0.017, 0.216] | [0.018, 0.219] | [0.017, 0.200] | [0.003, 0.214] | [0.002, 0.203] | [0.003, 0.216] | [0.002, 0.183] | [0.002, 0.194] | [0.003, 0.185] | [0.002, 0.168] | [0.002, 0.172] | [0.002, 0.170] |         |  |          |         |  |  |          |  |  |  |  |  |
|             |    | [0.006, 0.254] | [0.006, 0.265] | [0.008, 0.265] | [0.009, 0.266] | [0.009, 0.268] | [0.012, 0.257] | [0.016, 0.275] | [0.017, 0.262] | [0.024, 0.261] |                |                |                |                |                |                |                |                |                |         |  |          |         |  |  |          |  |  |  |  |  |
|             | 4  | [0.007, 0.269] | [0.006, 0.275] | [0.008, 0.276] | [0.004, 0.255] | [0.005, 0.237] | [0.004, 0.250] | [0.004, 0.229] | [0.003, 0.234] | [0.004, 0.224] |                |                |                |                |                |                |                |                |                |         |  |          |         |  |  |          |  |  |  |  |  |
|             |    | [0.007, 0.314] | [0.008, 0.322] | [0.008, 0.319] | [0.013, 0.313] | [0.015, 0.313] | [0.018, 0.329] | [0.018, 0.310] | [0.028, 0.318] | [0.029, 0.317] |                |                |                |                |                |                |                |                |                |         |  |          |         |  |  |          |  |  |  |  |  |
|             | 6  | [0.021, 0.340] | [0.013, 0.311] | [0.017, 0.320] | [0.009, 0.301] | [0.012, 0.293] | [0.009, 0.278] | [0.006, 0.303] | [0.008, 0.289] | [0.007, 0.283] |                |                |                |                |                |                |                |                |                |         |  |          |         |  |  |          |  |  |  |  |  |
|             |    | [0.009, 0.374] | [0.008, 0.382] | [0.009, 0.382] | [0.015, 0.377] | [0.011, 0.388] | [0.014, 0.390] | [0.021, 0.377] | [0.030, 0.377] | [0.030, 0.367] |                |                |                |                |                |                |                |                |                |         |  |          |         |  |  |          |  |  |  |  |  |
|             | 8  | [0.033, 0.394] | [0.030, 0.371] | [0.024, 0.382] | [0.023, 0.363] | [0.016, 0.373] | [0.021, 0.354] | [0.015, 0.336] | [0.012, 0.349] | [0.015, 0.351] |                |                |                |                |                |                |                |                |                |         |  |          |         |  |  |          |  |  |  |  |  |
|             |    | [0.015, 0.430] | [0.009, 0.440] | [0.010, 0.439] | [0.017, 0.442] | [0.013, 0.455] | [0.024, 0.451] | [0.017, 0.445] | [0.021, 0.443] | [0.039, 0.451] |                |                |                |                |                |                |                |                |                |         |  |          |         |  |  |          |  |  |  |  |  |
|             | 10 | [0.053, 0.440] | [0.047, 0.451] | [0.058, 0.445] | [0.045, 0.430] | [0.037, 0.434] | [0.041, 0.417] | [0.028, 0.408] | [0.026, 0.414] | [0.027, 0.405] |                |                |                |                |                |                |                |                |                |         |  |          |         |  |  |          |  |  |  |  |  |
|             |    | [0.001, 0.089] | [0.001, 0.088] | [0.001, 0.085] | [0.001, 0.090] | [0.002, 0.089] | [0.002, 0.087] | [0.003, 0.092] | [0.003, 0.088] | [0.004, 0.094] |                |                |                |                |                |                |                |                |                |         |  |          |         |  |  |          |  |  |  |  |  |
| 200 samples | 2  | [0.002, 0.139] | [0.002, 0.132] | [0.002, 0.135] | [0.001, 0.097] | [0.001, 0.098] | [0.001, 0.090] | [0.001, 0.095] | [0.001, 0.084] |                |                |                |                |                |                |                |                |                |                |         |  |          |         |  |  |          |  |  |  |  |  |
|             |    | [0.002, 0.108] | [0.001, 0.107] | [0.001, 0.102] | [0.002, 0.100] | [0.002, 0.105] | [0.002, 0.105] | [0.002, 0.103] | [0.003, 0.099] | [0.004, 0.114] |                |                |                |                |                |                |                |                |                |         |  |          |         |  |  |          |  |  |  |  |  |
|             | 4  | [0.004, 0.182] | [0.004, 0.158] | [0.004, 0.166] | [0.002, 0.140] | [0.001, 0.127] | [0.001, 0.128] | [0.001, 0.130] | [0.001, 0.115] | [0.001, 0.109] |                |                |                |                |                |                |                |                |                |         |  |          |         |  |  |          |  |  |  |  |  |
|             |    | [0.002, 0.126] | [0.002, 0.120] | [0.001, 0.122] | [0.002, 0.117] | [0.002, 0.116] | [0.002, 0.121] | [0.003, 0.123] | [0.003, 0.116] | [0.004, 0.120] |                |                |                |                |                |                |                |                |                |         |  |          |         |  |  |          |  |  |  |  |  |
|             | 6  | [0.008, 0.209] | [0.004, 0.192] | [0.006, 0.184] | [0.003, 0.159] | [0.002, 0.154] | [0.002, 0.157] | [0.002, 0.150] | [0.003, 0.159] | [0.002, 0.153] |                |                |                |                |                |                |                |                |                |         |  |          |         |  |  |          |  |  |  |  |  |
|             |    | [0.003, 0.145] | [0.002, 0.145] | [0.002, 0.143] | [0.002, 0.129] | [0.002, 0.126] | [0.002, 0.126] | [0.003, 0.124] | [0.002, 0.128] | [0.003, 0.126] |                |                |                |                |                |                |                |                |                |         |  |          |         |  |  |          |  |  |  |  |  |
|             | 8  | [0.013, 0.249] | [0.011, 0.252] | [0.009, 0.225] | [0.006, 0.204] | [0.004, 0.209] | [0.003, 0.182] | [0.004, 0.190] | [0.003, 0.170] | [0.003, 0.193] |                |                |                |                |                |                |                |                |                |         |  |          |         |  |  |          |  |  |  |  |  |
|             |    | [0.002, 0.171] | [0.003, 0.170] | [0.002, 0.169] | [0.002, 0.140] | [0.002, 0.145] | [0.003, 0.150] | [0.003, 0.141] | [0.003, 0.147] | [0.003, 0.147] |                |                |                |                |                |                |                |                |                |         |  |          |         |  |  |          |  |  |  |  |  |
|             | 10 | [0.028, 0.288] | [0.024, 0.288] | [0.017, 0.278] | [0.013, 0.241] | [0.009, 0.243] | [0.007, 0.234] | [0.005, 0.218] | [0.004, 0.230] | [0.004, 0.207] |                |                |                |                |                |                |                |                |                |         |  |          |         |  |  |          |  |  |  |  |  |
|             |    | [0.001, 0.070] | [0.001, 0.061] | [0.001, 0.059] | [0.001, 0.040] | [0.001, 0.039] | [0.001, 0.045] | [0.001, 0.042] | [0.001, 0.039] | [0.001, 0.041] |                |                |                |                |                |                |                |                |                |         |  |          |         |  |  |          |  |  |  |  |  |
| 400 samples | 2  | [0.001, 0.083] | [0.001, 0.076] | [0.001, 0.068] | [0.000, 0.044] | [0.001, 0.041] | [0.000, 0.042] | [0.001, 0.045] | [0.001, 0.037] |                |                |                |                |                |                |                |                |                |                |         |  |          |         |  |  |          |  |  |  |  |  |
|             |    | [0.001, 0.088] | [0.001, 0.080] | [0.001, 0.071] | [0.001, 0.045] | [0.001, 0.042] | [0.001, 0.044] | [0.001, 0.045] | [0.001, 0.045] | [0.001, 0.044] |                |                |                |                |                |                |                |                |                |         |  |          |         |  |  |          |  |  |  |  |  |
|             | 4  | [0.002, 0.109] | [0.002, 0.105] | [0.001, 0.092] | [0.001, 0.061] | [0.001, 0.054] | [0.001, 0.049] | [0.000, 0.047] | [0.000, 0.037] | [0.000, 0.038] |                |                |                |                |                |                |                |                |                |         |  |          |         |  |  |          |  |  |  |  |  |
|             |    | [0.001, 0.110] | [0.001, 0.102] | [0.001, 0.104] | [0.001, 0.055] | [0.001, 0.048] | [0.001, 0.050] | [0.001, 0.048] | [0.001, 0.049] | [0.001, 0.045] |                |                |                |                |                |                |                |                |                |         |  |          |         |  |  |          |  |  |  |  |  |
|             | 6  | [0.003, 0.133] | [0.002, 0.125] | [0.002, 0.122] | [0.001, 0.085] | [0.001, 0.073] | [0.001, 0.068] | [0.001, 0.058] | [0.001, 0.055] | [0.000, 0.051] |                |                |                |                |                |                |                |                |                |         |  |          |         |  |  |          |  |  |  |  |  |
|             |    | [0.002, 0.150] | [0.002, 0.140] | [0.002, 0.134] | [0.001, 0.085] | [0.001, 0.072] | [0.001, 0.063] | [0.001, 0.052] | [0.001, 0.049] | [0.001, 0.046] |                |                |                |                |                |                |                |                |                |         |  |          |         |  |  |          |  |  |  |  |  |
|             | 8  | [0.006, 0.181] | [0.005, 0.166] | [0.004, 0.159] | [0.001, 0.117] | [0.001, 0.107] | [0.001, 0.097] | [0.001, 0.087] | [0.001, 0.071] | [0.001, 0.071] |                |                |                |                |                |                |                |                |                |         |  |          |         |  |  |          |  |  |  |  |  |
|             |    | [0.002, 0.178] | [0.003, 0.167] | [0.002, 0.173] | [0.002, 0.127] | [0.001, 0.119] | [0.001, 0.111] | [0.001, 0.070] | [0.001, 0.056] | [0.001, 0.055] |                |                |                |                |                |                |                |                |                |         |  |          |         |  |  |          |  |  |  |  |  |
|             | 10 | [0.012, 0.212] | [0.010, 0.203] | [0.012, 0.207] | [0.004, 0.156] | [0.004, 0.158] | [0.002, 0.145] | [0.001, 0.122] | [0.001, 0.116] | [0.001, 0.099] |                |                |                |                |                |                |                |                |                |         |  |          |         |  |  |          |  |  |  |  |  |

Table 2: 95% confidence interval of error of the estimated regional measure with respect to the true bivariate GC with weights known for differing sample sizes  $N$ , AR model order  $P$ , SIR and SNR. The bold text is the error for CGC and the *italics* is for GCCA. As the number of samples or the order increases, CGC performs better than GCCA. In addition, as SNR decreases, CGC performs worse.

| N           | P  | SNR = 1       |               |               | SNR = 5       |               |               | SNR = 25      |               |               |
|-------------|----|---------------|---------------|---------------|---------------|---------------|---------------|---------------|---------------|---------------|
|             |    | SIR = 1       | SIR = 5       | SIR = 25      | SIR = 1       | SIR = 5       | SIR = 25      | SIR = 1       | SIR = 5       | SIR = 25      |
| 100 samples |    |               |               |               |               |               |               |               |               |               |
|             | 2  | 44.20%        | 45.47%        | 44.29%        | 32.13%        | 32.27%        | 30.29%        | 25.43%        | 28.19%        | 26.86%        |
|             | 4  | <b>52.07%</b> | 48.27%        | 47.81%        | 39.87%        | 37.67%        | 36.48%        | 35.62%        | 32.19%        | 31.71%        |
|             | 6  | <b>52.33%</b> | <b>50.33%</b> | 49.43%        | 44.00%        | 41.07%        | 39.43%        | 41.90%        | 38.10%        | 38.00%        |
|             | 8  | <b>54.13%</b> | <b>53.13%</b> | <b>52.38%</b> | 46.13%        | 47.67%        | 42.76%        | 44.38%        | 38.57%        | 41.81%        |
|             | 10 | <b>54.60%</b> | <b>55.40%</b> | <b>53.43%</b> | 49.93%        | 48.53%        | 48.48%        | 45.33%        | 44.48%        | 44.57%        |
| 200 samples |    |               |               |               |               |               |               |               |               |               |
|             | 2  | <b>65.27%</b> | <b>62.67%</b> | <b>61.81%</b> | 45.60%        | 42.67%        | 41.81%        | 34.95%        | 35.05%        | 32.95%        |
|             | 4  | <b>70.60%</b> | <b>68.87%</b> | <b>68.48%</b> | <b>55.27%</b> | <b>51.07%</b> | 48.57%        | 42.57%        | 40.48%        | 39.24%        |
|             | 6  | <b>77.47%</b> | <b>74.67%</b> | <b>73.71%</b> | <b>59.73%</b> | <b>56.13%</b> | <b>53.05%</b> | 48.95%        | <b>50.10%</b> | 46.00%        |
|             | 8  | <b>81.00%</b> | <b>82.00%</b> | <b>78.67%</b> | <b>67.53%</b> | <b>67.00%</b> | <b>59.05%</b> | <b>57.62%</b> | <b>54.76%</b> | <b>53.62%</b> |
|             | 10 | <b>87.20%</b> | <b>86.40%</b> | <b>82.67%</b> | <b>77.47%</b> | <b>76.60%</b> | <b>73.05%</b> | <b>66.10%</b> | <b>64.57%</b> | <b>61.62%</b> |
| 400 samples |    |               |               |               |               |               |               |               |               |               |
|             | 2  | <b>75.40%</b> | <b>72.47%</b> | <b>69.43%</b> | 41.13%        | 37.53%        | 32.10%        | 17.62%        | 15.05%        | 11.62%        |
|             | 4  | <b>83.73%</b> | <b>80.47%</b> | <b>79.90%</b> | <b>56.60%</b> | <b>50.73%</b> | 46.76%        | 26.57%        | 24.48%        | 23.14%        |
|             | 6  | <b>87.07%</b> | <b>87.20%</b> | <b>84.57%</b> | <b>65.33%</b> | <b>63.27%</b> | <b>58.76%</b> | 39.33%        | 38.29%        | 33.71%        |
|             | 8  | <b>92.73%</b> | <b>92.40%</b> | <b>90.29%</b> | <b>78.47%</b> | <b>76.40%</b> | <b>72.00%</b> | <b>53.71%</b> | <b>50.48%</b> | 47.33%        |
|             | 10 | <b>94.80%</b> | <b>94.80%</b> | <b>94.67%</b> | <b>86.80%</b> | <b>88.27%</b> | <b>85.81%</b> | <b>70.10%</b> | <b>68.38%</b> | <b>65.05%</b> |

Table 3: Percentage of simulations in which CGC is closer to the true causality in simulation than GCCA. **Bold** indicates those parameters for which CGC has less error a majority of the time. At low SNR or high model order  $P$ , CGC is closer to the true causality than GCCA for most simulations. For low numbers of samples and low model order, GCCA benefits from having fewer parameters, and is thus a slightly better estimator of the underlying causality; however, based on Table 2 both metrics are poor in estimating the underlying causality.
